# Supplementary material
Source: PubMed Central journal article supplement (PMC3027178)
Supplement: supp_tpc.110.080036_Supplemental_Data.pdf [file supp_tpc.110.080036_Supplemental_Data.pdf]

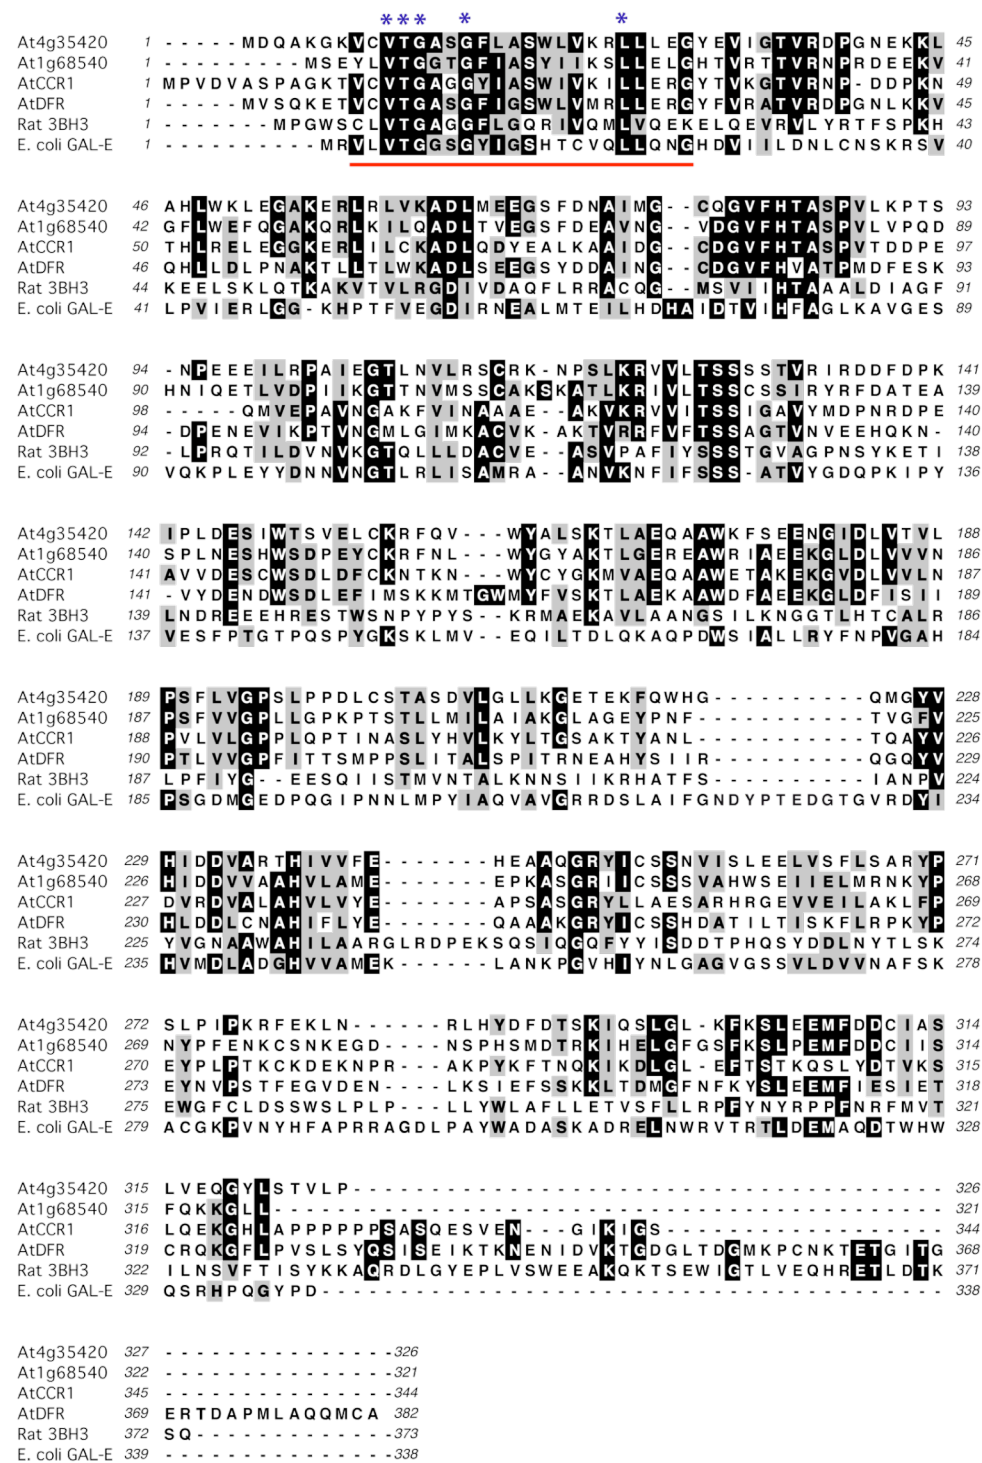

**Supplemental Figure 1.** Multiple alignment of oxido-reductase predicted protein sequences obtained with ClustalW.

Black boxes indicate identical amino acids and grey boxes similar residues. The putative N-terminal NAD(P)H binding domain is underlined and amino acids strictly conserved in the N-terminal sequence are indicated by an asterisk. Accession numbers are : At1g15950 for *Arabidopsis* cinnamoyl-CoA reductase (AtCCR1) ; At5g42800 for *Arabidopsis* dihydroflavonol reductase (AtDFR) ; AAH92571 for rat 3-β hydroxysteroid deshydrogenase/isomerase ; BAI54225 for *E. coli* UDP-galactose-4-epimerase.

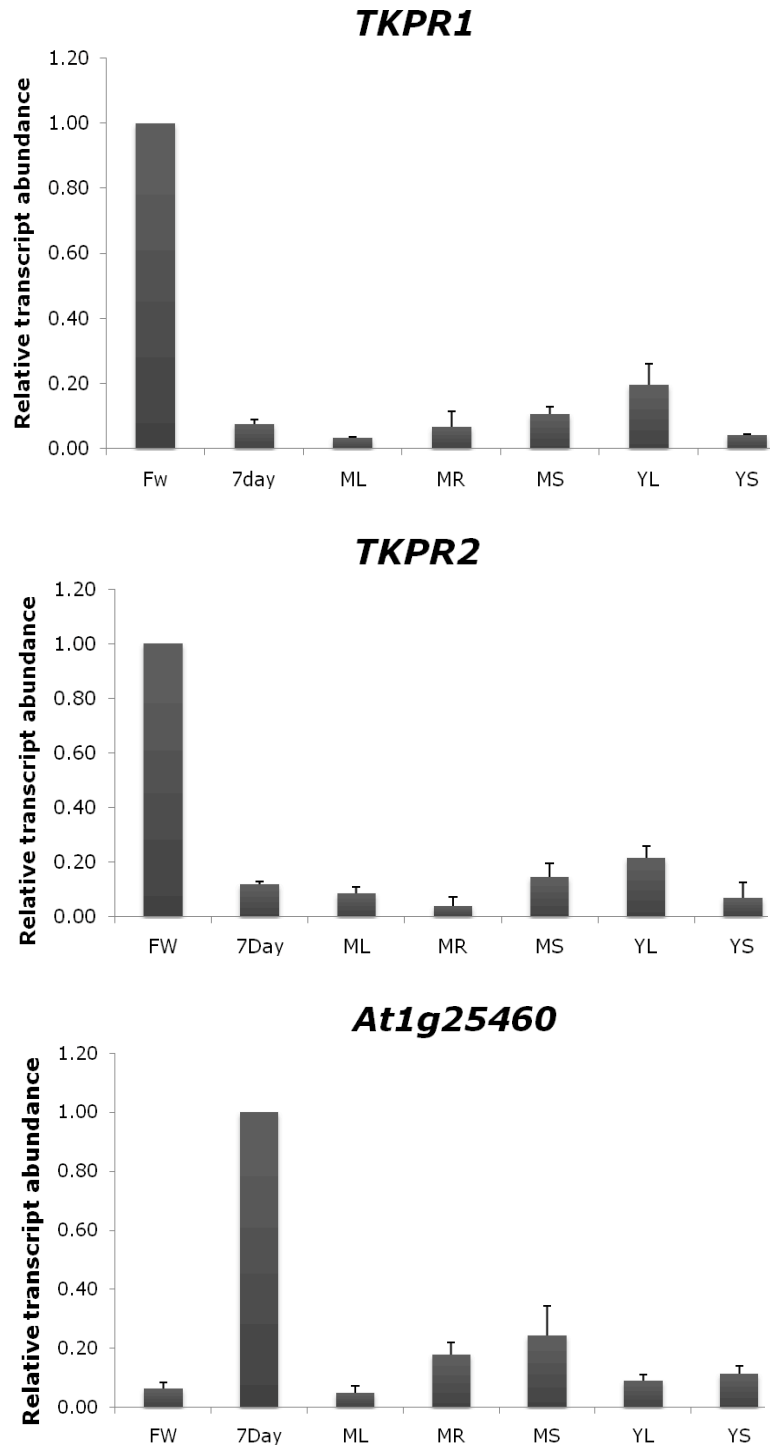

**Supplemental Figure 2.** Developmental expression profiles of *TKPR1*, *TKPR2* and *At1g25460*.

Relative *TKPR1*, *TKPR2* and *At1g25460* expression levels in various *Arabidopsis* organs were analyzed by quantitative RT-PCR. Expression was calculated using the  $\Delta\Delta CT$  method and is represented relative to the organ with the highest level of expression (flower buds for *TKPR1* and *TKPR2*; 7-day old seedlings for *At1g25460*) set at 1.0. *Actin2* (*At3g18780*) was used as a reference gene. Primer sequences are given in Supplemental Table 2 online. Bars represent standard deviations from the means of triplicate determinations. 7day, 7-day old seedlings; Fw, flower; ML, mature leaf; MR, mature root; MS, mature stem; YL, young leaf; YS, young stem.

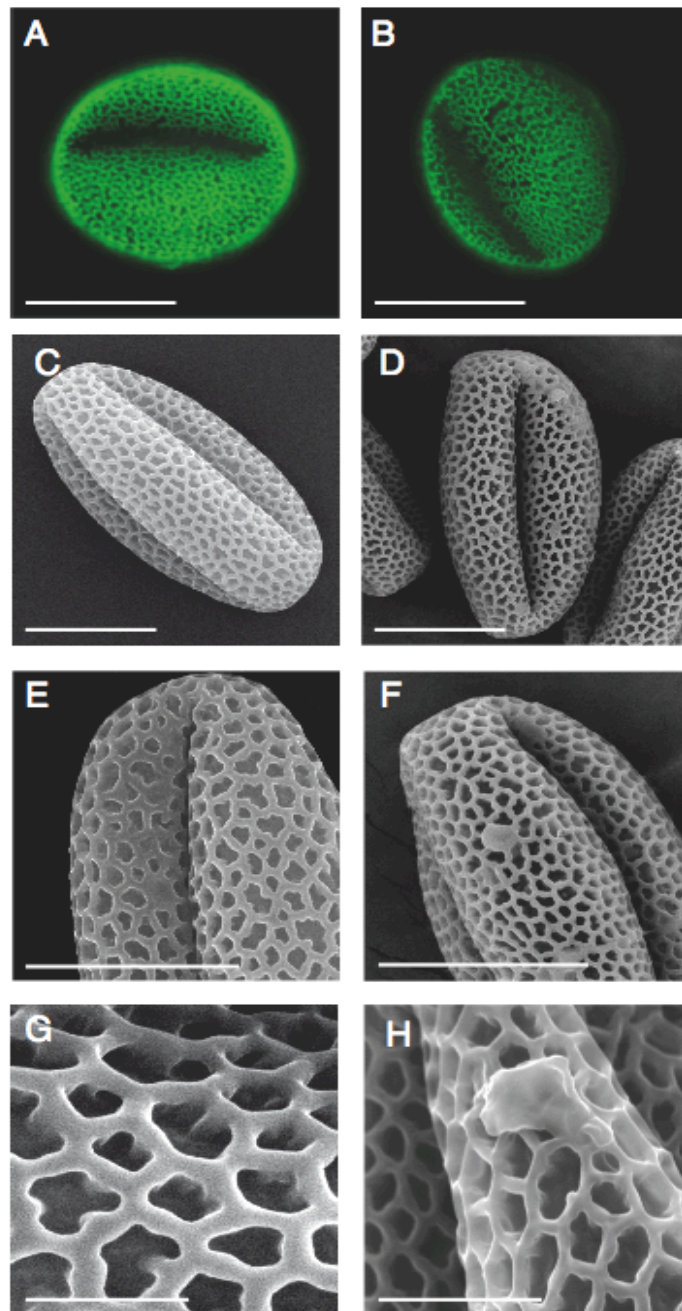

**Supplemental Figure 3.** Comparison of exine architecture in wild-type and *tkpr2-2* pollen.

**(A), (C), (E) and (G)** Wild-type pollen

**(B), (D), (F) and (H)** : *tkpr2-2* pollen

**(A)** and **(B)** Epifluorescence microscope images of wild-type and mutant pollen. Pollen was stained with the fluorescent dye auramine O and visualized using fluorescein isothiocyanate settings.

**(C)** to **(H)** Scanning electron micrographs of wild-type and mutant pollen grains.

Scale bars = 10  $\mu\text{m}$  (**A-F**), 2  $\mu\text{m}$  (**G, H**)

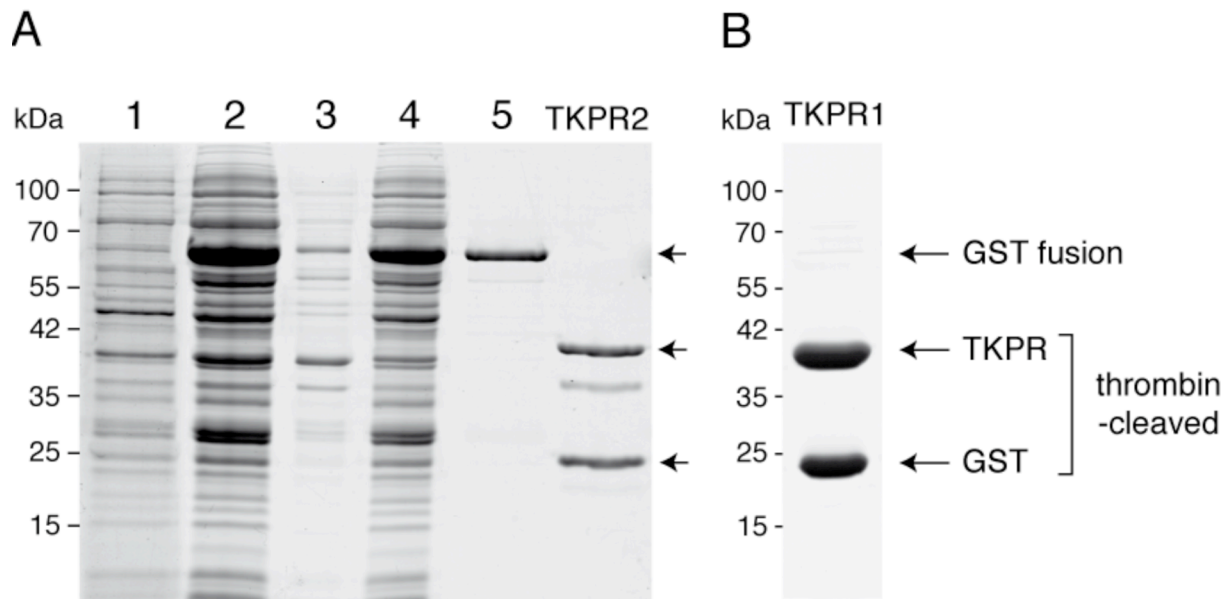

**Supplemental Figure 4.** Analysis of recombinant protein preparations at different steps of purification.

Bacterial protein extracts were prepared and purified as described in Methods section. Protein preparations were analyzed by electrophoresis on SDS-polyacrylamide gels and Coomassie Blue staining.

**(A)** Purification steps of TKPR2 are illustrated. Lane 1, total protein from uninduced bacteria ; lane 2, total protein from induced bacteria that was further fractionated; lane 3, soluble fraction ; lane 4, insoluble fraction ; lane 5, fusion protein from soluble fraction purified by affinity chromatography on glutathion-agarose ; TKPR2, thrombin-cleaved preparation containing reductase and GST proteins (arrows).

**(B)** Purified TKPR1 preparation after affinity chromatography and thrombin cleavage.

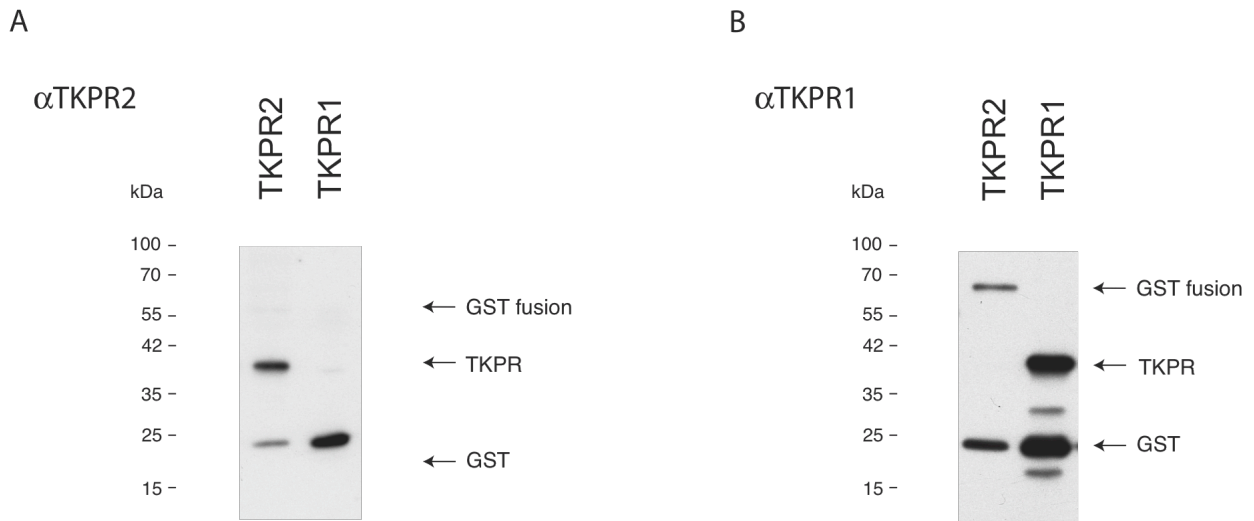

**Supplemental Figure 5.** Characterization of antibodies raised against TKPR proteins. Purified recombinant TKPR1 and TKPR2 proteins were immunoblotted with each polyclonal serum.

**(A)** Polyclonal antibodies raised against TKPR2 recombinant protein recognized TKPR2 but not TKPR1. The presence of anti GST antibodies was also evidenced.

**(B)** Antibodies raised against TKPR1 were specific for TKPR1 protein and did not react with TKPR2. Anti GST antibodies were also present in the serum and detected GST protein.

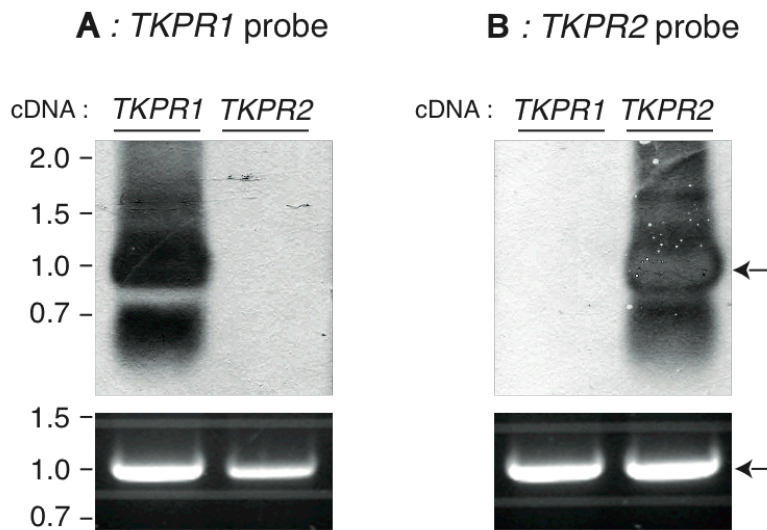

**Supplemental Figure 6.** Specificity of *TKPR* nucleotidic probes.

Specificity of probes used for *in situ* hybridization was evaluated by Southern blotting. Coding sequences of *TKPR* transcripts were amplified by PCR using gene-specific primers. Amplicons of 0.95 kb predicted size were visualized on EtBr-stained 0.7% agarose gels (lower panels) before transfer onto nylon membranes. Blots were hybridized separately with digoxigenin-labelled riboprobes corresponding to coding sequences of *TKPR1* (A) or *TKPR2* (B). An indication of size positions in kb is given on the left. Arrows indicate positions of amplicons on gel and blot. Data show the absence of cross-hybridization between the two transcripts.

**Supplemental Table 1.** Primers used in cloning, genotyping and RT-PCR experiments.

| Gene (mutant line)                        | Type of study                       | Forward Primer (5' → 3')                                                                       | Reverse Primer (5' → 3')                                                                   |
|-------------------------------------------|-------------------------------------|------------------------------------------------------------------------------------------------|--------------------------------------------------------------------------------------------|
| AT4g35420                                 | Quantitative RT-PCR                 | CAGAGATCCAGGAAATGAGAAGAAAC                                                                     | AAGCACCGGAGAAGCAGTATGGAA                                                                   |
| <i>ACT1N2</i>                             |                                     | CCAGAAGGATGCATATGTTGGTGA                                                                       | GAGGAGCCTCGGTAAGAAGA                                                                       |
| AT4g35420 (SAIL_837_D01)                  | Genotyping                          | GATGCCAAGGAGTGTTCAT<br>ATTTTGCCGATTCGGAAC                                                      | TGGACCCAAAAACGAGTCAT<br>TGGACCCAAAAACGAGTCAT                                               |
| AT4g35420 (FLAG019D03)                    |                                     | GATGCCAAGGAGTGTTCAT<br>GATGCCAAGGAGTGTTCAT                                                     | CTCGAGCTCTTATGGAAGAACAGTAGATAA<br>CGTGTGCCAGGTGCCACGGAATAGT                                |
| AT1G68540 (SALK_129453C)                  |                                     | GTGCCAAGTCTAAAGCCACA<br>ATTTTGCCGATTCGGAAC                                                     | TGAAGGATCCAAATCCCAAC<br>TGAAGGATCCAAATCCCAAC                                               |
| AT1G68540 (GK838H09)                      |                                     | AAACACATGCGAAGACATGG<br>ATATTGACCATCATACTCATTGC                                                | CCATCAACACCATTCACTGC<br>CCATCAACACCATTCACTGC                                               |
| AT4g35420                                 | cDNA cloning for protein production | GAGGAATTCCAATGGATCAAGCAAAGGGAAA<br>EcoRI ATG                                                   | CTCGAGCTCTTATGGAAGAACAGTAGATAA<br>SacI Stop                                                |
| AT1G68540                                 |                                     | GAGTCTAGAGATGTCTGAGTATTTGGTAACG<br>XbaI ATG                                                    | CTCCCATGGTTAGAGCAGACCCTTCTTCTG<br>PstI Stop                                                |
| AT4g35420                                 | In situ hybridization               | GATCCAGGAAATGAGAAGAAAC<br>CATAATACGACTCACTATAGGGTTTCTCAAACCTCT<br>TGGGG                        | GTTTCTCAAACCTCTTGGGG<br>CATAATACGACTCACTATAGGGATCCAGG<br>AAATGAGAAGAAAC                    |
| AT1g68540                                 |                                     | CATAATACGACTCACTATAGGATGTCTGAGTATTTG<br>GTAACCTGG<br>TTA GAG CAG ACC CTT CTT CTG AAA AC        | CATAATACGACTCACTATAGGTTAGAGCA<br>GACCCTTCTTCTGAAAAAC<br>ATG TCT GAG TAT TTG GTA ACT GG     |
| AT4g35420<br>AT1G68540<br><i>TUBULIN3</i> | RT-PCR                              | GAGGAATTCCAATGGATCAAGCAAAGGGAAA<br>GAGTCTAGAGATGTCTGAGTATTTGGTAACCTG<br>GTGGAGCCTTACAACGCTACTT | CTCGAGCTCTTATGGAAGAACAGTAGATAA<br>CTCCCATGGTTAGAGCAGACCCTTCTTCTG<br>GACAGCAAGTCACACCAGACAT |
| AT4g35420                                 | GFP fusion                          | GGGGACAAGTTTGTACAAAAAAGCAGGCTTCATGG<br>ATCAAGCAAAGGGAAA                                        | GGGGACCACTTTGTACAAGAAAGCTGGGT<br>CTGGAAGAACAGTAGATAAA                                      |
| AT1g68540                                 |                                     | GGGGACAAGTTTGTACAAAAAAGCAGGCTTCATGT<br>CTGAGTATTTGGTAAC                                        | GGGGACCACTTTGTACAAGAAAGCTGGGT<br>CGAGCAGACCCTTCTTCTGA                                      |

**Supplemental Table 2.** Genes and expression data used for constructing the phylogenetic tree of Figure 10.

| <i>Gene name</i>        | Species                            | Gene model or GenBank ID | Expression          | Reference                                |
|-------------------------|------------------------------------|--------------------------|---------------------|------------------------------------------|
| <b>AtTKPR2</b>          | <b><i>Arabidopsis thaliana</i></b> | <b>At1g68540</b>         | <b>tapetum</b>      | <b>this study</b>                        |
| <b>AtTKPR1</b>          | <b><i>Arabidopsis thaliana</i></b> | <b>At4g35420</b>         | <b>tapetum</b>      | <b>this study,<br/>Tang et al., 2008</b> |
| <i>OsDFR2</i>           | <i>Oryza sativa</i>                | Os09g32020               | tapetum             | Yau et al., 2005                         |
| <i>At1g25460</i>        | <i>Arabidopsis thaliana</i>        | At1g25460                | young seed, silique | eFP Browser <sup>3</sup>                 |
| <i>O. sativa</i>        | <i>Oryza sativa</i>                | Os01g03670               | tapetum             | Huang et al., 2009                       |
| <i>T. aestivum</i>      | <i>Triticum aestivum</i>           | TC323911                 | flower bud          | DFCI EST <sup>1</sup>                    |
| <i>L. solanum 2</i>     | <i>Lycopersicon solanum</i>        | BI929118.1               | flower bud          | ncbi EST <sup>2</sup>                    |
| <i>L. solanum 1</i>     | <i>Lycopersicon solanum</i>        | BI930405.1               | flower bud          | DFCI EST <sup>1</sup>                    |
| <i>B. rapa 1</i>        | <i>Brassica rapa</i>               | EX048625.1               | flower bud          | ncbi EST <sup>2</sup>                    |
| <i>B. rapa 2</i>        | <i>Brassica rapa</i>               | EX049142.1               | anther              | ncbi EST <sup>2</sup>                    |
| <i>R. communis 1</i>    | <i>Ricinus communis</i>            | EE255951.1               | flower              | ncbi EST <sup>2</sup>                    |
| <i>P. trichocarpa 1</i> | <i>Populus trichocarpa</i>         | EEE88913.1               | male catkins        | eFP Browser <sup>3</sup>                 |
| <i>P. patens 1</i>      | <i>Physcomitrella patens</i>       | EDQ63261.1               | green sporophyte    | ncbi EST <sup>2</sup>                    |
| <i>P. patens 2</i>      | <i>Physcomitrella patens</i>       | EDQ65809.1               | green sporophyte    | ncbi EST <sup>2</sup>                    |
| <i>V. vinifera 1</i>    | <i>vitis vinifera</i>              | CBI37707.1               | flower bud          | ncbi EST <sup>2</sup>                    |
| <i>P. trichocarpa 2</i> | <i>Populus trichocarpa</i>         | BU878087                 | xylem, root         | eFP Browser <sup>3</sup>                 |
| <i>V. vinifera 2</i>    | <i>vitis vinifera</i>              | CBI27024.1               | nd                  |                                          |
| <i>Z. mays</i>          | <i>Zea mays</i>                    | ACG40388.1               | nd                  |                                          |
| <i>R. communis 2</i>    | <i>Ricinus communis</i>            | EEF30759.1               | nd                  |                                          |
| <i>PtANR2</i>           | <i>Populus trichocarpa</i>         | EEE97882.1               |                     |                                          |
| <i>PtANR1</i>           | <i>Populus trichocarpa</i>         | EEE86150.1               |                     |                                          |
| <i>AtANR/BAN</i>        | <i>Arabidopsis thaliana</i>        | At1G61720                |                     |                                          |
| <i>Os04g53920</i>       | <i>Oryza sativa</i>                | <i>Os04g53920</i>        |                     |                                          |
| <i>Os04g53850</i>       | <i>Oryza sativa</i>                | <i>Os04g53850</i>        |                     |                                          |
| <i>PtDFR1</i>           | <i>Populus trichocarpa</i>         | EEE80032.1               |                     |                                          |
| <i>AtDFR</i>            | <i>Arabidopsis thaliana</i>        | At5G42800                |                     |                                          |
| <i>VvDFRL</i>           | <i>vitis vinifera</i>              | CAA53578.1               |                     |                                          |
| <i>ZmDFRL</i>           | <i>Zea mays</i>                    | AF347696_1               |                     |                                          |
| <i>OsDFRL</i>           | <i>Oryza sativa</i>                | AAB58474.1               |                     |                                          |
| <i>PtCCR2</i>           | <i>Populus trichocarpa</i>         | EEE70443.1               |                     |                                          |
| <i>AtCCR1</i>           | <i>Arabidopsis thaliana</i>        | At1G15950                |                     |                                          |
| <i>ZmCCRL</i>           | <i>Zea mays</i>                    | ACN31052.1               |                     |                                          |
| <i>OsCCRL</i>           | <i>Oryza sativa</i>                | Os08g04415               |                     |                                          |

<sup>1</sup> <http://compbio.dfci.harvard.edu/tgi/plant.html><sup>2</sup> <http://blast.ncbi.nlm.nih.gov/Blast.cgi><sup>3</sup> <http://bar.utoronto.ca/efp/cgi-bin/efpWeb.cgi>

nd, no data

**Supplemental Reference**

**Huang, M. D., Wei, F. J., Wu, C. C., Hsing, Y. I. and Huang, A. H.** (2009) Analyses of advanced rice anther transcriptomes reveal global tapetum secretory functions and potential proteins for lipid exine formation. *Plant Physiol* **149**: 694-707.
